# Supplementary material
Source: PubMed Central journal article supplement (PMC3689299)

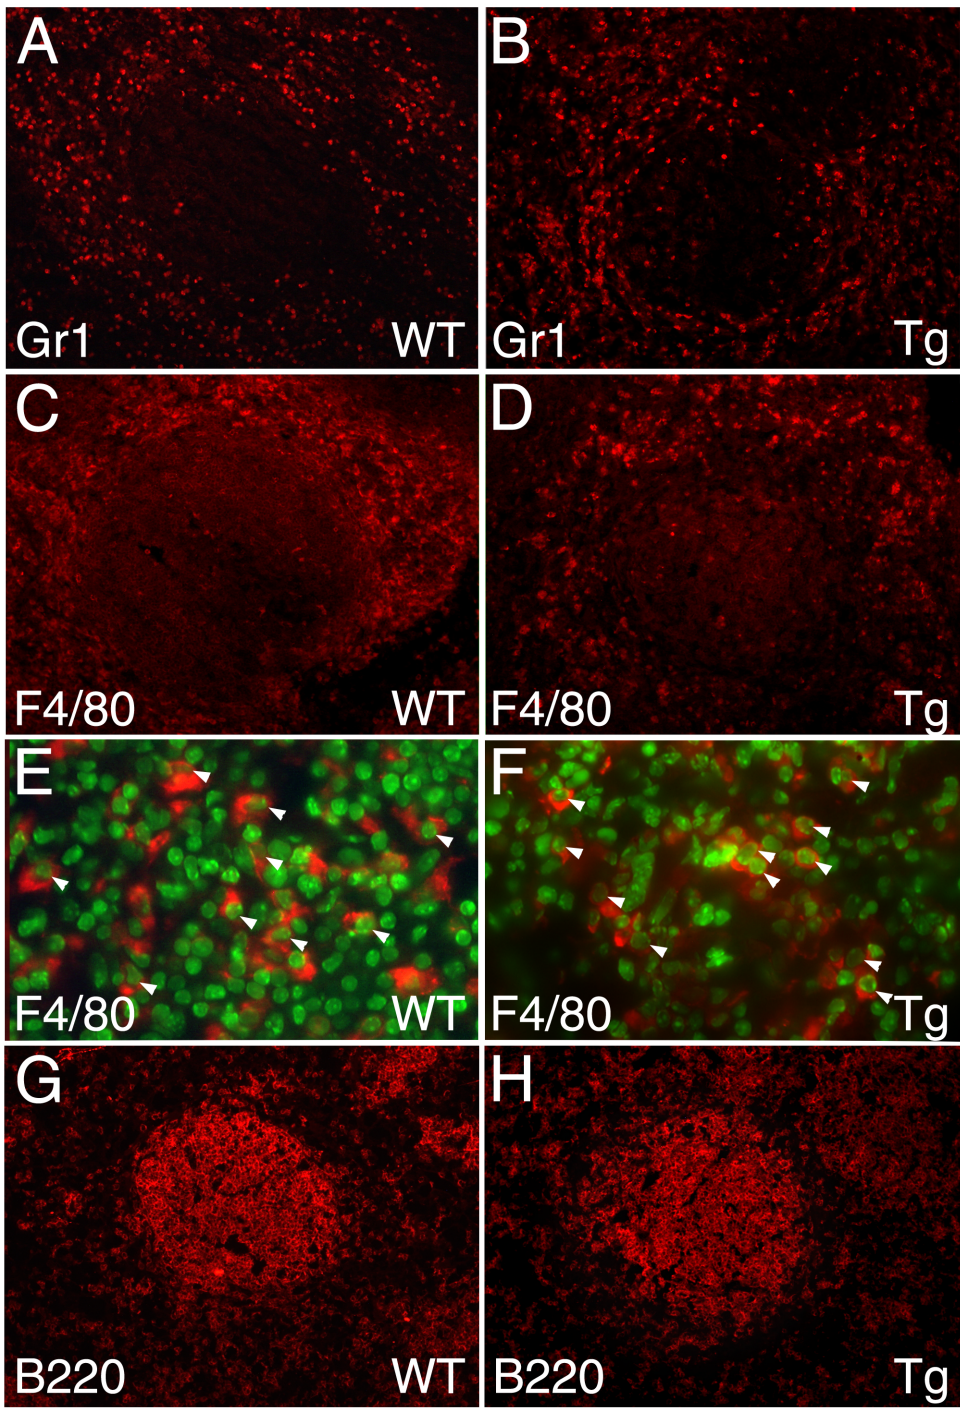

(I)

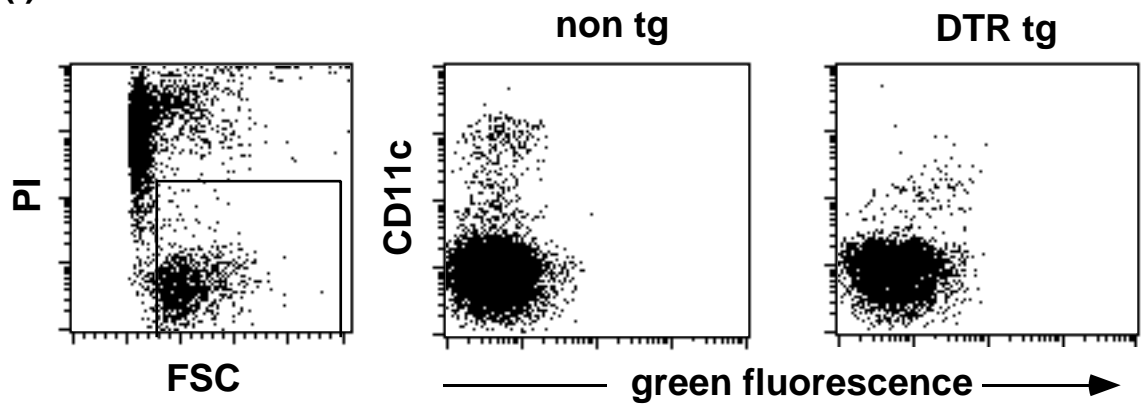

Figure S1

Supplement: NIHMS58502-supplement-Supplementary_Material.pdf [file NIHMS58502-supplement-Supplementary_Material.pdf]
